# Supplementary material
Source: MDPI journal article supplement (https://www.mdpi.com/2673-9496/2/4/16)
Supplement: s1 [file s1]

Supplementary

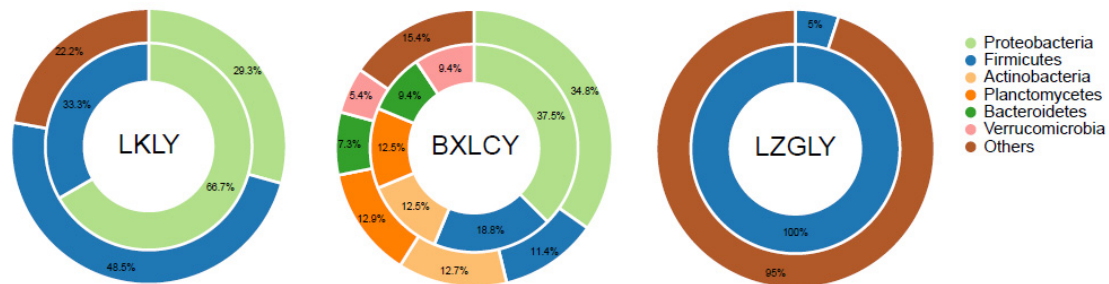

**Figure S1.** Attribution analysis of ARGs and bacteria phyla in all fish gut content samples showed by circle map.

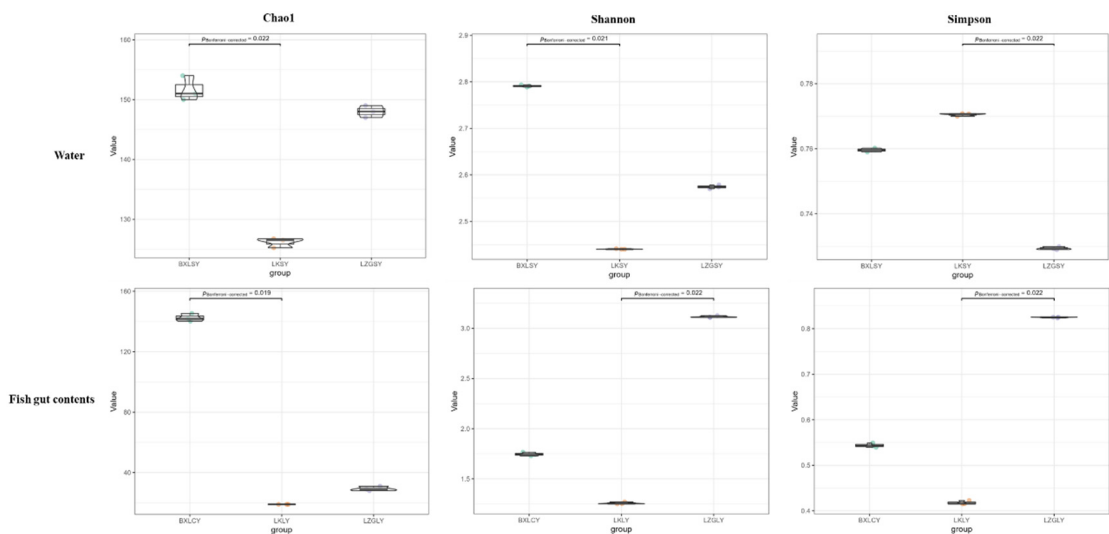

**Figure S2.** Alpha diversity of bacteria community in phylum level.

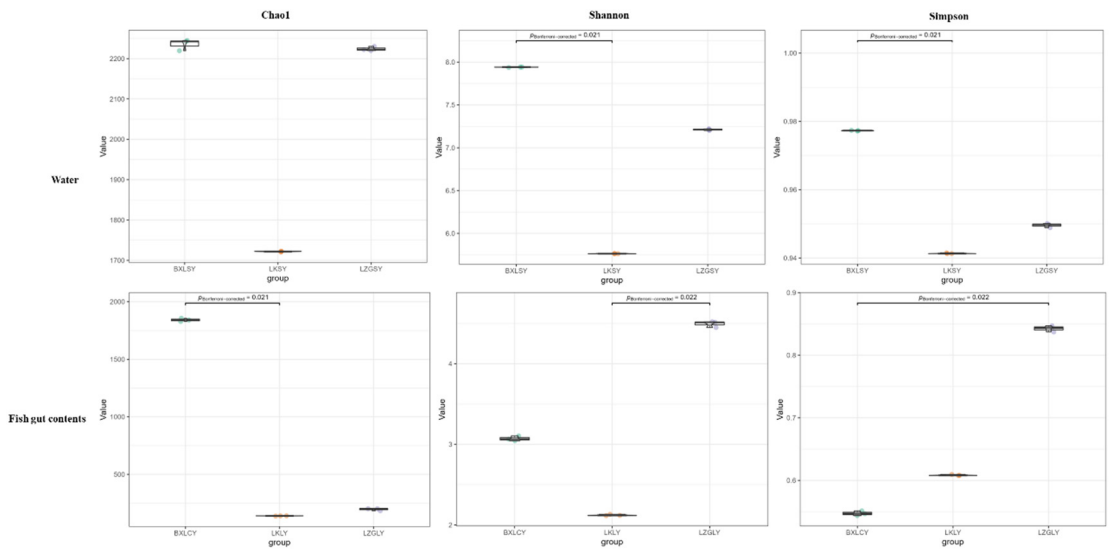

**Figure S3.** Alpha diversity of bacteria community in genus level.

**Table S1** Antibiotics concentrations in water samples from three different fish farms

| Antibiotics (ng/L)    | LKSY1 | LKSY2 | LKSY3 | LZGSY1 | LZGSY2 | LZGSY3 | BXLSY1 | BXLSY2 | BXLSY3 |
|-----------------------|-------|-------|-------|--------|--------|--------|--------|--------|--------|
| Sulfamonomethoxine    | 0     | 0     | 0     | 0      | 0      | 0      | 0.21   | 0.26   | 0.29   |
| Trimethoprim          | 0     | 0     | 0     | 0      | 0      | 0      | 6.24   | 6.26   | 6.25   |
| Sulfamerazine         | 4.3   | 4.7   | 4.5   | 13.81  | 13.92  | 14.02  | 6.61   | 6.73   | 6.54   |
| Sulfamethoxazole      | 0     | 0     | 0     | 0      | 0      | 0      | 48.41  | 48.35  | 48.37  |
| Sulfadiazine          | 1.62  | 1.72  | 1.82  | 1.42   | 1.44   | 1.44   | 1.58   | 1.59   | 1.62   |
| Sulfisoxazole         | 0     | 0     | 0     | 0      | 0      | 0      | 1.05   | 1.05   | 1.05   |
| Sulfamethoxydiazine   | 0     | 0     | 0     | 0      | 0      | 0      | 4.45   | 4.45   | 4.35   |
| Danofloxacin mesylate | 0     | 0     | 0     | 0      | 0      | 0      | 1.51   | 1.45   | 1.45   |
| Ciprofloxacin         | 1.34  | 1.33  | 1.35  | 3.05   | 3.06   | 3.05   | 4.95   | 4.96   | 4.94   |
| Enoxacin              | 0     | 0     | 0     | 0      | 0      | 0      | 0.90   | 0.92   | 0.95   |
| Norfloxacin           | 0.2   | 0.2   | 0.2   | 0      | 0      | 0      | 1.56   | 1.56   | 1.56   |
| flumequine            | 0.61  | 0.63  | 0.65  | 0      | 0      | 0      | 0      | 0      | 0      |
| Difloxacin            | 0     | 0     | 0     | 0      | 0      | 0      | 0.62   | 0.65   | 0.67   |
| Ofloxacin             | 8.19  | 8.18  | 8.16  | 1.62   | 1.62   | 1.64   | 3.56   | 3.54   | 3.55   |
| Enrofloxacin          | 1.77  | 1.79  | 1.77  | 9.48   | 9.49   | 9.48   | 22.27  | 22.28  | 22.26  |
| Lomefloxacin          | 0     | 0     | 0     | 0      | 0      | 0      | 1.24   | 1.26   | 1.23   |
| Oxytetracycline       | 0     | 0     | 0     | 0      | 0      | 0      | 0      | 0      | 0      |
| Doxycycline           | 0     | 0     | 0     | 0      | 0      | 0      | 0      | 0      | 0      |
| Timicosin             | 0     | 0     | 0     | 0      | 0      | 0      | 2.05   | 2.05   | 2.05   |
| Azithromycin          | 0     | 0     | 0     | 0      | 0      | 0      | 5.64   | 5.65   | 5.65   |
| Lincomycin            | 0     | 0     | 0     | 0      | 0      | 0      | 0      | 0      | 0      |
| Florfenicol           | 1.03  | 1.02  | 1.05  | 4.94   | 4.95   | 4.95   | 2.01   | 2.03   | 2.03   |

**Table S2** Antibiotics concentrations in fish gut content samples from three different fish farms

[illegible]

**Table S3** Heavy metals concentrations in water samples from three different fish farms

| Sample |     | Heavy metals (µg/L) |       |      |     |     |     |     |      |     |     |     |     |     |     |
|--------|-----|---------------------|-------|------|-----|-----|-----|-----|------|-----|-----|-----|-----|-----|-----|
| name   | V   | Cr                  | Mn    | Fe   | Co  | Ni  | Cu  | Zn  | As   | Se  | Ag  | Cd  | Pb  | U   | Hg  |
| LKSY1  | 3.0 | 0.8                 | 5.2   | 15.4 | 0.1 | 0.4 | 0.7 | 0.7 | 7.8  | 0.4 | 0.0 | 0.1 | 0.1 | 1.6 | 0.0 |
| LKSY2  | 3.0 | 0.8                 | 5.2   | 15.4 | 0.1 | 0.4 | 0.7 | 0.7 | 7.8  | 0.4 | 0.0 | 0.1 | 0.1 | 1.6 | 0.0 |
| LKSY3  | 3.0 | 0.8                 | 5.2   | 15.4 | 0.1 | 0.4 | 0.7 | 0.7 | 7.8  | 0.4 | 0.0 | 0.1 | 0.1 | 1.6 | 0.0 |
| LZGSY1 | 5.2 | 1.3                 | 141.1 | 51.0 | 0.9 | 2.6 | 1.0 | 1.4 | 11.8 | 0.5 | 0.0 | 0.1 | 0.1 | 9.6 | 0.0 |
| LZGSY2 | 5.2 | 1.3                 | 141.1 | 51.0 | 0.9 | 2.6 | 1.0 | 1.4 | 11.8 | 0.5 | 0.0 | 0.1 | 0.1 | 9.6 | 0.0 |
| LZGSY3 | 5.2 | 1.3                 | 141.1 | 51.0 | 0.9 | 2.6 | 1.0 | 1.4 | 11.8 | 0.5 | 0.0 | 0.1 | 0.1 | 9.6 | 0.0 |
| BXLSY1 | 5.1 | 0.9                 | 25.7  | 26.5 | 0.3 | 1.2 | 0.4 | 1.0 | 5.8  | 0.5 | 0.0 | 0.1 | 0.2 | 8.9 | 0.0 |
| BXLSY2 | 5.1 | 0.9                 | 25.7  | 26.5 | 0.3 | 1.2 | 0.4 | 1.0 | 5.8  | 0.5 | 0.0 | 0.1 | 0.2 | 8.9 | 0.0 |
| BXLSY3 | 5.1 | 0.9                 | 25.7  | 26.5 | 0.3 | 1.2 | 0.4 | 1.0 | 5.8  | 0.5 | 0.0 | 0.1 | 0.2 | 8.9 | 0.0 |

**Table S4** Heavy metals concentrations in fish gut content samples from three different fish farms

| Sample |        | Heavy metals (µg/kg) |         |          |       |       |        |         |       |       |      |        |       |       |      |
|--------|--------|----------------------|---------|----------|-------|-------|--------|---------|-------|-------|------|--------|-------|-------|------|
| name   | V      | Cr                   | Mn      | Fe       | Co    | Ni    | Cu     | Zn      | As    | Se    | Ag   | Cd     | Pb    | U     | Hg   |
| LKLY1  | 310.0  | 684.0                | 31400.0 | 450000.0 | 118.0 | 488.0 | 4960.0 | 25800.0 | 245.0 | 374.0 | 22.3 | 1200.0 | 68.0  | 114.0 | 11.0 |
| LKLY2  | 310.0  | 684.0                | 31400.0 | 450000.0 | 118.0 | 488.0 | 4960.0 | 25800.0 | 245.0 | 374.0 | 22.3 | 1200.0 | 68.0  | 114.0 | 11.0 |
| LKLY3  | 310.0  | 684.0                | 31400.0 | 450000.0 | 118.0 | 488.0 | 4960.0 | 25800.0 | 245.0 | 374.0 | 22.3 | 1200.0 | 68.0  | 114.0 | 11.0 |
| LZGLY1 | 114.0  | 232.0                | 2300.0  | 60000.0  | 44.0  | 130.0 | 1710.0 | 47700.0 | 16.0  | 387.0 | 6.9  | 86.0   | 45.8  | 30.0  | 3.0  |
| LZGLY2 | 114.0  | 232.0                | 2300.0  | 60000.0  | 44.0  | 130.0 | 1710.0 | 47700.0 | 16.0  | 387.0 | 6.9  | 86.0   | 45.8  | 30.0  | 3.0  |
| LZGLY3 | 114.0  | 232.0                | 2300.0  | 60000.0  | 44.0  | 130.0 | 1710.0 | 47700.0 | 16.0  | 387.0 | 6.9  | 86.0   | 45.8  | 30.0  | 3.0  |
| BXLCY1 | 2040.0 | 1780.0               | 28300.0 | 970000.0 | 408.0 | 952.0 | 2740.0 | 9980.0  | 245.0 | 106.0 | 30.0 | 22.3   | 481.0 | 141.0 | 3.0  |
| BXLCY2 | 2040.0 | 1780.0               | 28300.0 | 970000.0 | 408.0 | 952.0 | 2740.0 | 9980.0  | 245.0 | 106.0 | 30.0 | 22.3   | 481.0 | 141.0 | 3.0  |
| BXLCY3 | 2040.0 | 1780.0               | 28300.0 | 970000.0 | 408.0 | 952.0 | 2740.0 | 9980.0  | 245.0 | 106.0 | 30.0 | 22.3   | 481.0 | 141.0 | 3.0  |
